# Supplementary material
Source: publisher figshare collection journal article supplement (https://tandf.figshare.com/articles/dataset/_/7867925)

## Supplementary Figure captions

Figure S1. Previously unknown and undescribed species recorded for the first time in the Black Sea. A) *Tinogullmia* sp. A; inset (A') shows detail of end of test. B) *Psammophaga* sp. 2. C) *Nellya* sp. D) *Vellaria* sp. X. E,F) *Tinogullmia* sp. 3. G,H) Allogromiid sp. G, *sensu* Anikeeva, Gooday 2016. Scale bars = 100  $\mu$ m.

Figure S2. Previously unknown and undescribed species recorded for the first time in the Black Sea. A) Saccamminidae gen. sp. C. B) Saccamminid sp. 24. C) Saccamminid sp. 25. D). Saccamminid sp. 26. E) Allogromiid sp. R; insets shows details of ends of test. F) Allogromiid sp. 36. G) Allogromiid sp. 34. Scale bars = 100  $\mu$ m.

Figure S3. A,B) *Psammophaga* sp. of Gooday et al. (2011); image courtesy of Prof. Jan Pawlowski. Scale bars = 100  $\mu$ m.

Figure S4. Previously recorded species. A-I - specimens first illustrated in Sergeeva et al. (2010); J,K - specimens first illustrated in Sergeeva and Anikeeva (2014). A) *Bathyallogromia* sp. B) Allogromiid sp. E (= Allogromiid gen. sp. E in Sergeeva et al., 2010). C,D) Allogromiid sp. 10. E,F) *Vellaria* sp. C. G) Saccamminid sp. 11. H) Allogromiid sp. 1. I) Allogromiid sp. J. J) Saccamminid sp. Y. K) Allogromiid sp. F. Scale bars = 100  $\mu$ m (A-C, E, G-K); 25  $\mu$ m (D,F)

Figure S5. Species previously recorded by Anikeeva and Gooday (2016). D-F, H – specimens first illustrated by Anikeeva and Gooday (2014, Fig. 2). A) Allogromiid sp. 30. B, C) Details of opposite ends of Allogromiid sp. 30. D) Allogromiid sp. 33. E) Saccamminid sp. 27. F) Saccamminid sp. 5. G) Saccamminid sp. 20. H) Saccamminid sp. 22. I) Saccamminid sp. 21. Scale bars = 100  $\mu$ m (A, D-I); 25  $\mu$ m (B,C).

# Supplementary Fig. S1

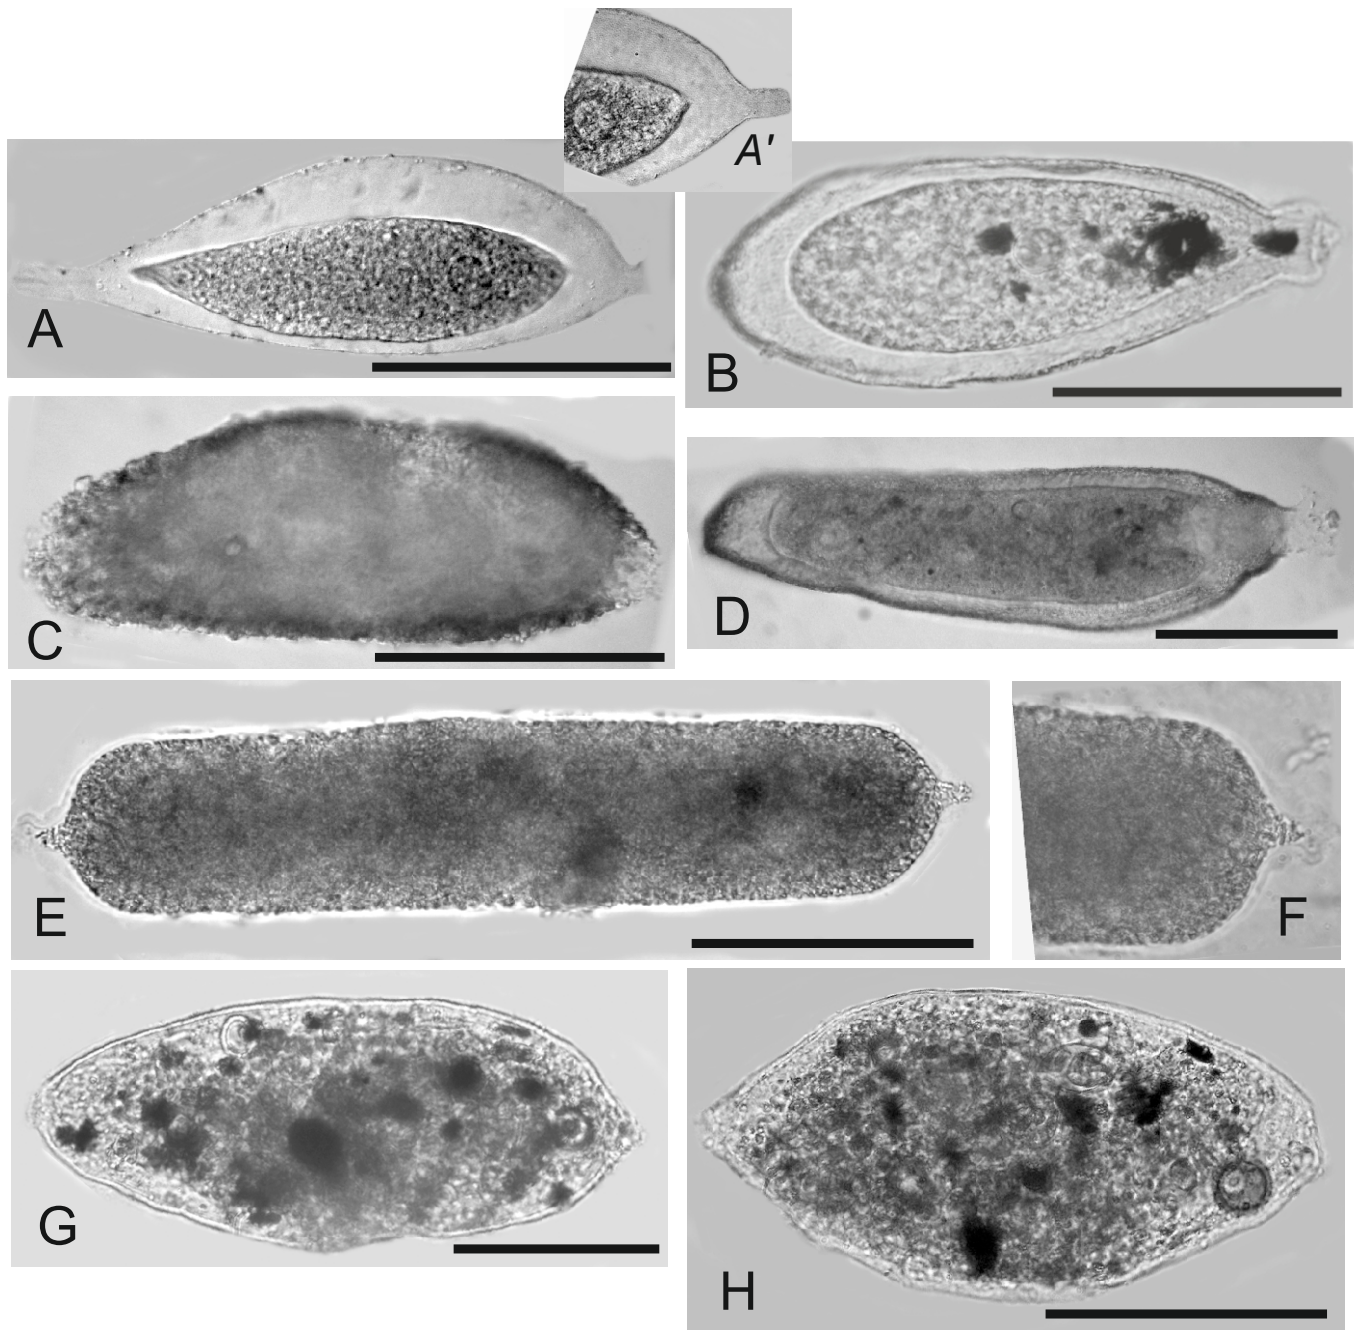

## Supplementary Fig. S2

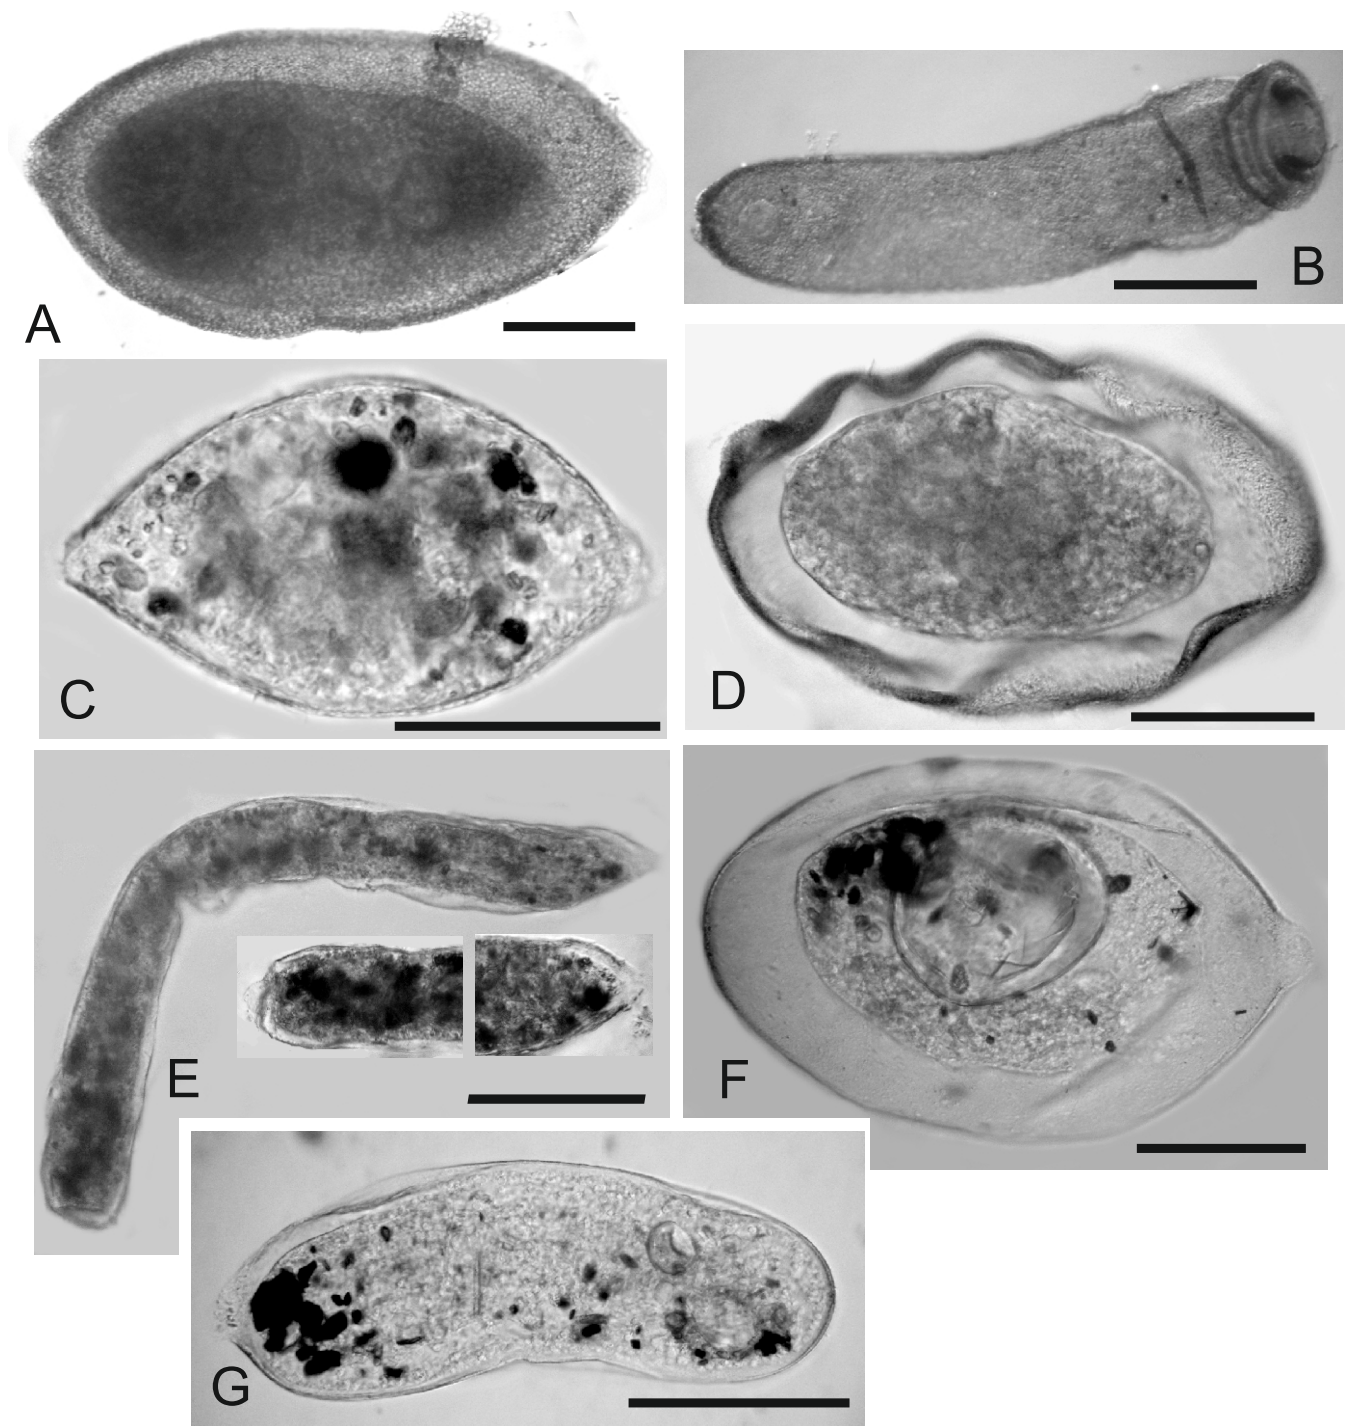

## Supplementary Fig. S3

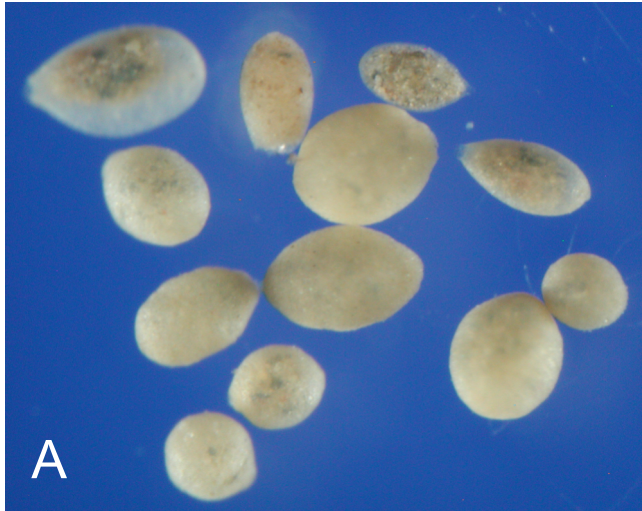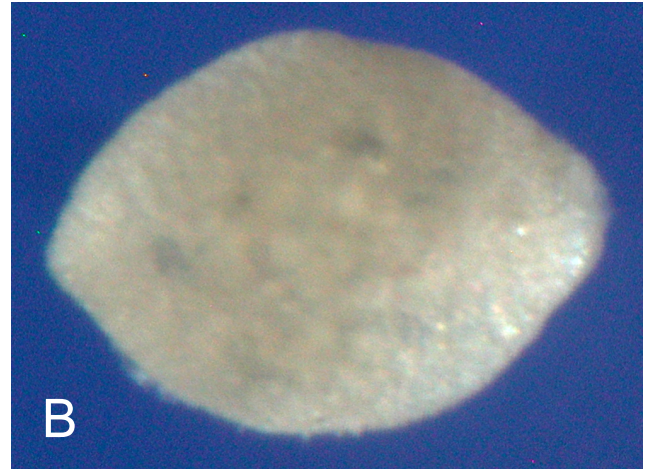

Supplementary Fig. S4

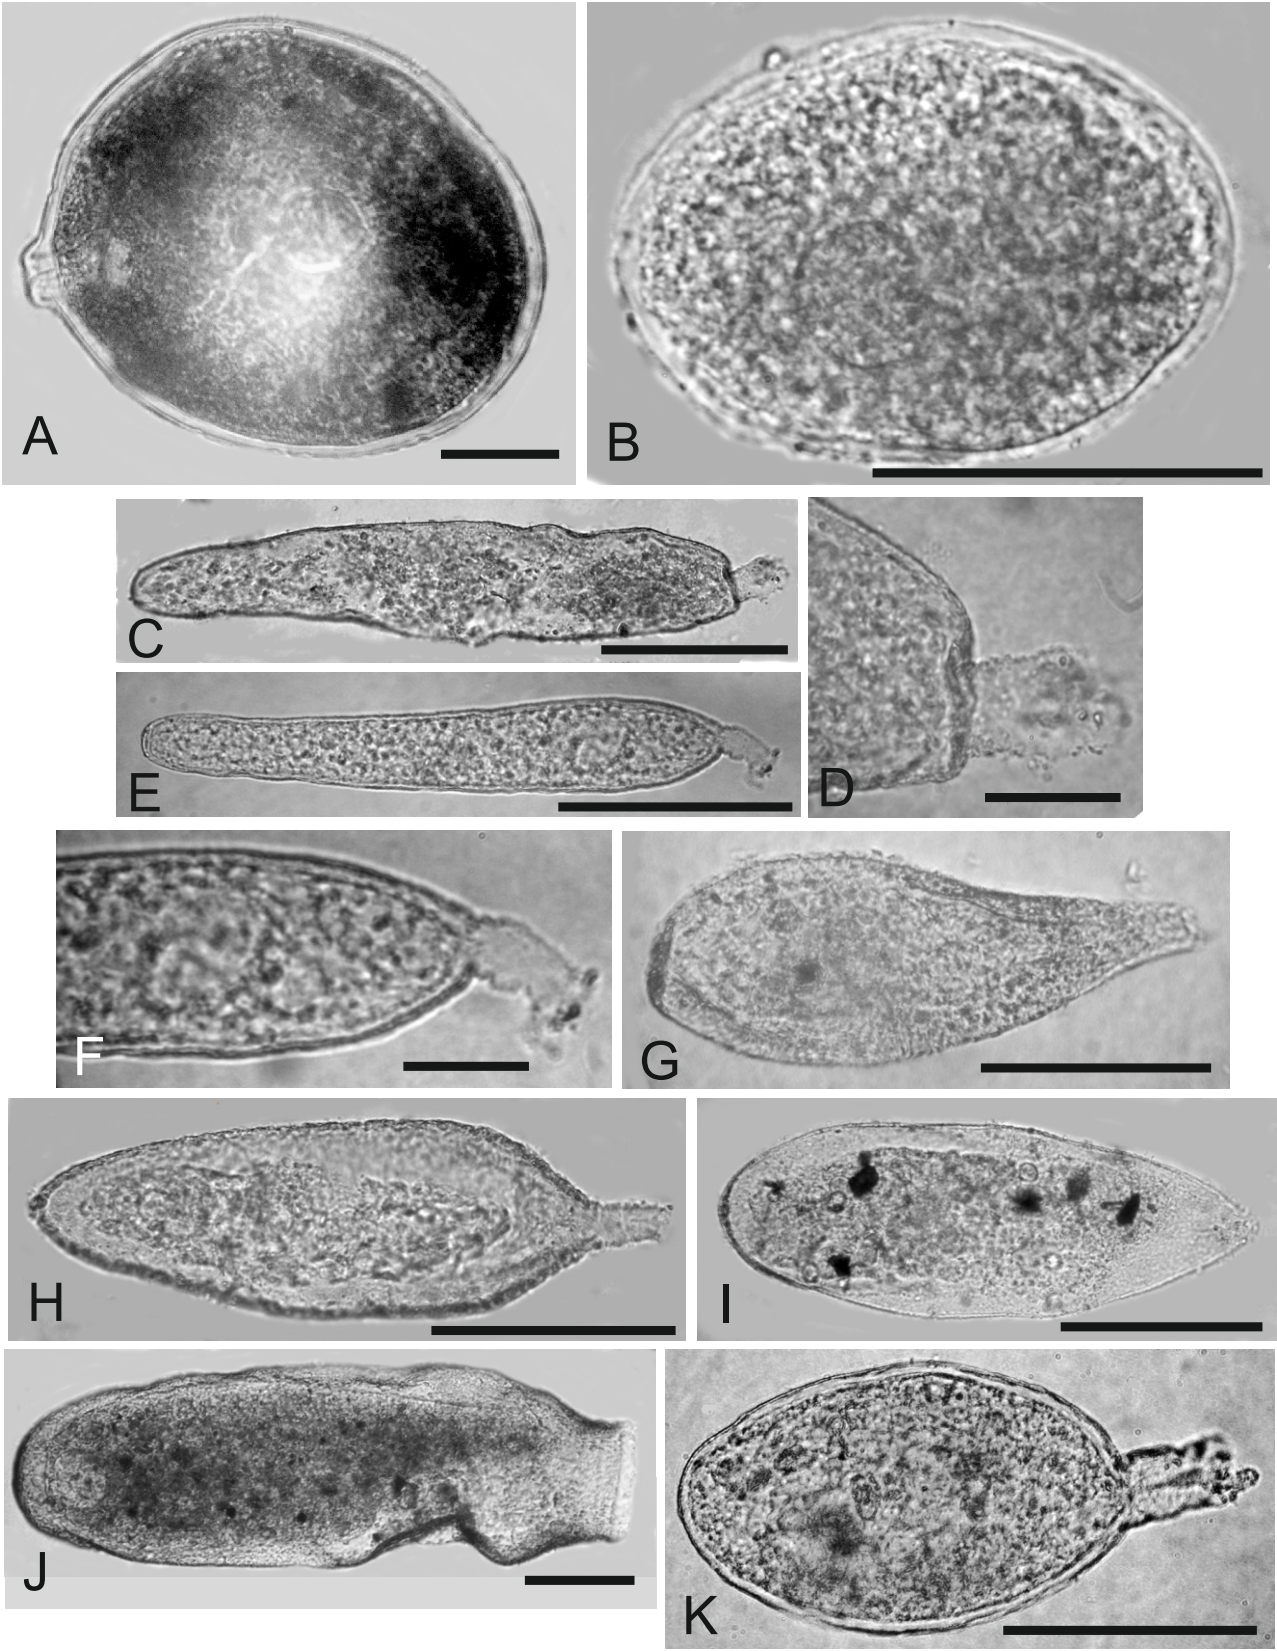

Supplementary Fig. S5

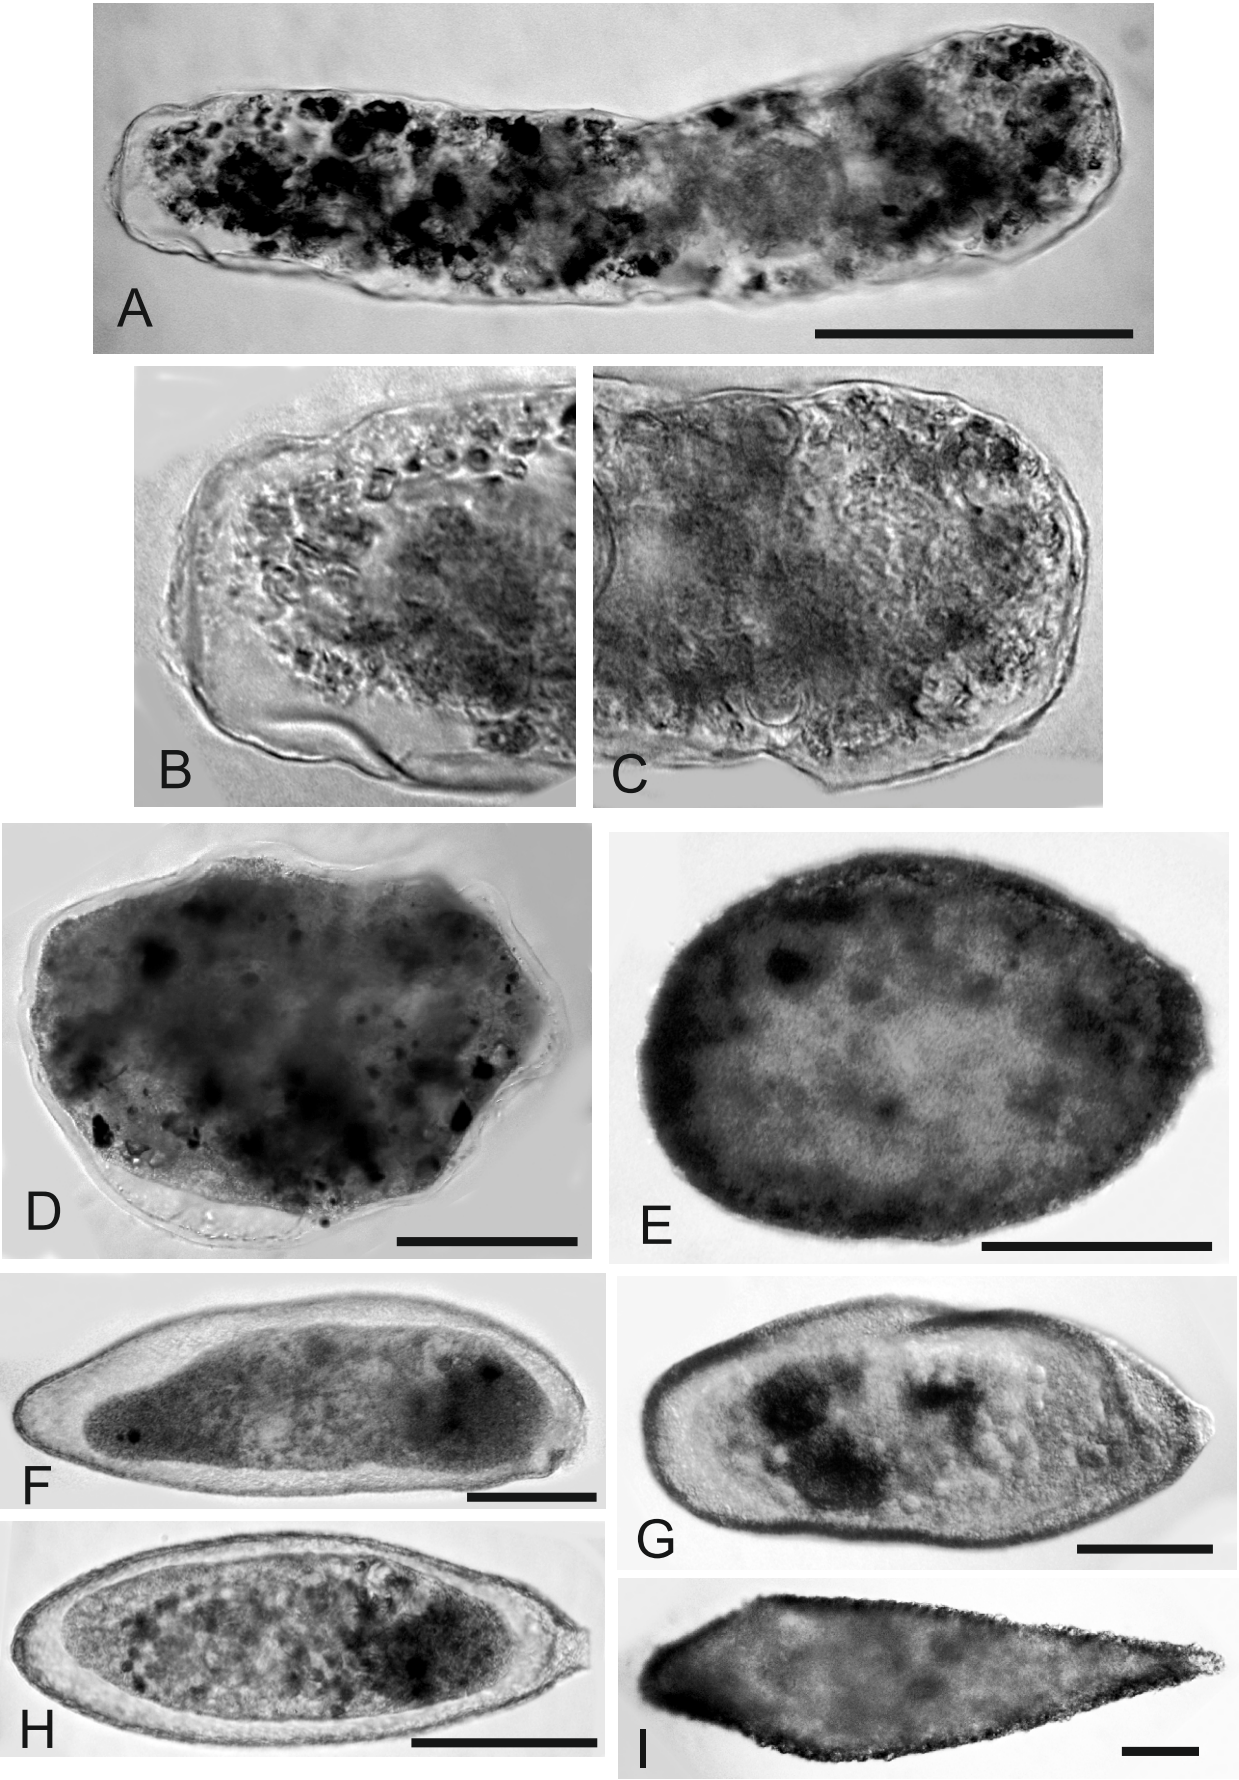

Supplement: Supplementary file 1 [file 2]
